# Supplementary material
Source: PubMed Central journal article supplement (PMC6035075)
Supplement: NIHMS955614-supplement-supplement_1.pdf [file NIHMS955614-supplement-supplement_1.pdf]

## **Inventory of Supplemental Information**

### **1. Supplemental Materials and Methods**

### **2. Supplemental Data**

Supplementary Figure 1

Supplementary Figure 2

Supplementary Figure 3

Supplementary Figure 4

Supplementary Figure 5

Supplementary Figure 6

Supplementary Figure 7

Supplementary Figure 8

Supplementary Figure 9

Supplementary Table 1. Provided as an Excel file.

Supplementary Table 2. Provided as an Excel file.

## Supplemental Materials and Methods

### Quantification of DCLK1+ cells

A. From spontaneous mouse model: DCLK1+ cells were counted per PanIN or ADM lesion. Data was shown as mean % TSA +/- SEM. To adequately identify the type of lesion in which DCLK1 is quantified, we have performed H&E stainings on parallel sections of DCLK1 Immunofluorescence-stained slides which allows distinction between the preneoplastic lesions (Fig S3A). For some slides that didn't have a clear parallel section we did IHC staining for DCLK1 with counterstaining for hematoxylin that allows distinction between the preneoplastic lesions (Fig S3B).

B. From human PDAC tumors: To quantify DCLK1 and ALDH1A1 stained by IHC we used the Allred scoring system which accounts for both the intensity of staining (0 = none, 1 = weak, 2 = moderate, 3 = strong) and the proportion of stained cells (0 = 0%, 1 = < 1%, 2 = 1 to 10%, 3 = 11 to 33%, 4 = 34 to 66%, 5 = > 66%) producing a sum score of the two values (intensity + proportion = 0 to 8)<sup>1</sup>.

### IL-17A stimulation

For IL-17A *in vitro* treatment, murine recombinant IL-17A proteins (R&D system, Minneapolis, MN) were used to stimulate cells at concentration of 10 ng/ml. To inhibit cell signaling, U0126 (Cell Signaling Technology, Danvers, MA), and BAY11-7082 (InvivoGen, San Diego, CA) were administered in cell culture medium (10 and 5  $\mu$ M) for five days.

### Tumor initiation assay

1, 5, or 10  $\times 10^3$  KPC cells or KPC cells treated with IL17 cytokine for 7 days suspended in 100  $\mu$ l of PBS were injected subcutaneously into the flank of C57BL/6 mice. Tumor incidents were monitored every 10 days for 30 days total. Assays were repeated three times. Limiting dilution

assays were performed with several cells concentration in murine experiments and  $5 \times 10^3$  cells/injection have been found to be the minimal concentration of cells required for forming tumors. If lower concentrations of cells were used, no tumors were formed in either the treatment or control groups.

#### Cell proliferation assay

To determine cell proliferation of KPC cells, 2,000 cells were plated per well in 96-well plates. Murine IL-17A cytokine recombinant protein (R&D system, Minneapolis, MN) at concentration of 0 and 10 ng/ml in full DMEM was added after deprivation of FBS 24h. WST-1 Cell Proliferation reagent (Clontech, Mountain View, CA) was used to measure cell proliferation for 0 to 7 days after IL-17A incubation following manufacturer's instructions. Assays were performed in triplicate and repeated three times. This is a colorimetric assay based on the cleavage of the WST-1 tetrazolium salt by mitochondrial dehydrogenases. Absorbance is then measured at 450 nm versus a 650 nm reference by using a plate reader.

#### Wound healing assay

KPC cells were plated into 6-well plates and cultured until 90% confluent. Cell monolayers were wounded with a sterile 200  $\mu$ l pipet tip and then incubated with DMEM containing 1% FBS and Murine IL-17A cytokine recombinant protein at concentration of 0 and 10ng/ml for 6, 12, 18 or 24 h in an atmosphere of 5% CO<sub>2</sub> at 37°C. Representative areas of wounded monolayers containing wounds of the same width were marked and photographed. After incubation, the same areas were photographed. The extent of wound repair was evaluated by measuring the wound area using the Image J (NIH). Each experiment was performed in triplicate wells and repeated three times.

#### Western blot

Cell pellets were harvested and washed twice with pre-cold 1X PBS (Corning, Corning, N.Y). Pellets were then lysed with RIPA buffer (Thermo Scientific, Waltham, MA) to prepare protein extracts and analyzed by immunoblotting. Nuclear and cytosolic proteins were extracted from cell pellets using a NE-PER Nuclear and Cytoplasmic Extraction Reagent (Thermo Scientific, Waltham, MA). Antibodies against the following proteins were used as probes: Dclk1 (Abcam, Cambridge, MA), Ac- $\alpha$ -tubulin (SIGMA, St. Louis, MO), Lamin A/C, ALDH1A1, NF $\kappa$ B-p65, I $\kappa$ B $\beta$ , p-Erk, Erk, p-p38, p38, p-JNK, JNK, p-Akt-S473, Tak1 (all from Cell Signaling Technology, Danvers, MA). The blots were incubated with primary antibody (1:1000) overnight at 4°C, washed three times with PBS/0.05% Tween® 20, followed by HRP-conjugated secondary antibody (Bio-Rad, Hercules, CA)(1:5000) for 1 hour at room temperature. The blots were visualized using a Clarity Western ECL substrate kit (Bio-Rad, Hercules, CA). As internal controls for equal protein loading, blots were stripped and probed with antibodies against beta-Actin (Abcam, Cambridge, MA).

#### NF- $\kappa$ B Binding Activity Assay

Mouse and human pancreatic adenocarcinoma cell line KPC and Capan-2 cells were plated into 100-mm culture dish, and grown to about 80% confluence. Human or murine recombinant IL-17A proteins (R&D system, Minneapolis, MN) were used to stimulate cells at concentration of 10 ng/ml. Nuclear protein was extracted at 0, 15, 30, 60, 120, 240, 480 minutes after IL-17A stimulation using a NE-PER™ Nuclear and Cytoplasmic Extraction kit (Thermo Scientific, 78833) following the product manuals. Then NF- $\kappa$ B binding activity was examined in nuclear protein extracts by NF- $\kappa$ B p65 Transcription Factor Assay Kit (Abcam ab133112) following manufacturer's instructions.

#### ALDH Activity Assay

An ALDH Activity Assay Kit (Colorimetric) (ab155893) from Abcam was performed. KPC cells were pre-stimulated with 10ng/ml IL17 for 7 days.

ALDH activity assay was performed according to manufacturer's instruction. In brief,  $2 \times 10^6$  KPC control and IL-17 stimulated cells were homogenized with 400 ul ALDH Assay buffer using Dounce homogenizer and 50 ul cell lysates were used to examine the ALDH activity and samples were measured in a kinetic mode (every 3 min) for up to 60 min.

#### RNA isolation and quantitative reverse transcription polymerase chain reaction (qRT-PCR)

Total RNA was extracted with RNeasy RNA isolation kit (Qiagen, Valencia, CA) and reverse transcribed with a cDNA Reverse Transcription Kit (Applied Biosystems, Foster City, CA), then amplified by TaqMan™ PreAmp Master Mix Kit (Applied Biosystems, Foster City, CA) following manufacturer's instructions. qRT-PCR was performed with TaqMan® Gene Expression Assays and TaqMan® Fast Advanced Master Mix (Applied Biosystems, Foster City, CA) on an ViiA™ 7 Real-Time PCR System machine (Applied Biosystems, Foster City, CA). GAPDH were used for normalization. Assays were run in triplicates.

#### Histopathology

Tumor-bearing mice were humanely sacrificed and the pancreas, or subcutaneously implanted tumors were excised, fixed in freshly prepared 4 % paraformaldehyde in PBS, pH 7.2. Tissues were embedded in paraffin, 5-µm sections obtained, and stained with hematoxylin and eosin (H&E) (VWR, West Chester, PA) following standard protocols for visual examination. The stained slides were reviewed and screened for representative tumor regions by a pathologist.

#### Immunohistochemistry

Paraformaldehyde-fixed, paraffin-embedded tissue sections were deparaffinized, rehydrated, and then boiled in a microwave oven with 0.01 M citrate buffer pH 6.0 (Diagnostic Biosystems, Pleasanton, CA) for 10 min for antigen retrieval. Endogenous peroxidases were blocked with 3% H<sub>2</sub>O<sub>2</sub> for 15 min. Nonspecific epitopes were blocked with normal horse serum (Jackson ImmunoResearch, West Grove, PA) for 30 min. The sections were incubated overnight at 4°C with antibodies against one of the following proteins: Dclk1 (Abcam, Cambridge, MA), cleaved Caspase-3 (Cell Signaling Technology, Danvers, MA), Ki67, IL17RA (Santa Cruz Biotechnology, Santa Cruz, CA), IL17RC (Bioss-USA, Woburn, Massachusetts). This was followed by using a SuperPicture™ 3rd Gen IHC Detection Kit (Invitrogen, Frederick, MD) following manufacturer's instructions. Slides were then counterstained with hematoxylin, mounted in Acrymount (StatLab, McKinney, TX), and visualized under a light microscope.

#### Immunofluorescence

Paraformaldehyde-fixed and paraffin-embedded sections were subjected to antigen retrieval and nonspecific epitopes blocking as described above, then incubated with antibodies against E-cadherin (Santa Cruz Biotechnology, Santa Cruz, CA) and Dclk1 (Abcam, Cambridge, MA). Samples were washed three times with PBS-Tween, followed by incubation with a fluorescence-conjugated secondary antibody (1:1000, Invitrogen). Nuclei were stained with 1:20,000 dilution of 4', 6-diamidino-2-phenylindole (DAPI) and slides were mounted in ProLong® Diamond Antifade Mountant (Invitrogen). Images were acquired using a Nikon confocal imaging microscope. A total of three slides per mouse were used, separated by 100 microns.

#### RNA sequencing

Total RNA from KPC cells exposed to IL17 or media was extracted. Each sample was assessed using Qubit 2.0 fluorometer and Agilent TapeStation 2200 for RNA quantity and quality. The cDNA libraries were pooled at a final concentration 1.8pM. Cluster generation and 75 bp single-

read dual-indexed sequencing was performed on Illumina NextSeq 500's. Total RNA libraries were generated using Illumina TruSeq Stranded mRNA sample preparation kit. The first step in the workflow involves purifying the poly-A containing mRNA molecules using poly-T oligo attached magnetic beads. Following purification, the mRNA is fragmented into small pieces using divalent cations. The cleaved RNA fragments are copied into first strand cDNA using reverse transcriptase and random primers. Strand specificity is achieved by using dUTP in the Second Strand Marking Mix, followed by second strand cDNA synthesis using DNA Polymerase I and RNase H. These cDNA fragments then have the addition of a single 'A' base and subsequent ligation of the adapter. The products are then purified and enriched with PCR to create the final cDNA library. The cDNA libraries are validated using KAPA Biosystems primer premix kit with Illumina-compatible DNA primers and Qubit 2.0 fluorometer. Quality is examined using Agilent TapeStation 2200.

Sequencing analysis was done using mRNA-seq Analysis on Maverix Analytic Platform (Maverix Biomics, Inc, San Mateo, CA). Raw sequencing reads from Illumina sequencing platform that was converted into FASTQ file format were quality checked for potential sequencing issues and contaminants using FastQC. Adapter sequences, primers, Ns, and reads with quality score below 28 were trimmed using fastq-mcf of ea-utils and Trimmomatic. Reads with a remaining length of fewer than 20bp after trimming were discarded. Single reads were mapped to the mouse genome (m10) using STAR in a strand specific manner. Pairwise differential expression was quantified using Cuffdiff. Cufflinks was used to determine FPKM levels for each gene from the STAR alignment and was used as input for Cuffdiff. Read counts were then normalized across all samples and significant differentially expressed genes were determined by adjusted P-value with a threshold of 0.05. Principal Component analysis is a statistical tool that is useful for exploratory data analysis. It uses combinations of the gene expression values for each sample to define a new set of unrelated variables. Similarities

between the data sets correlate to the distance in the projection of the space delimited by the principal components. RNA Sequencing data has been deposited at Sequence Read Archive (SRA accession: SRP132695).

### Dissociation of Adult Mouse Pancreas

Whole adult mouse pancreas was harvested in sterile conditions and digested using collagenase as previously described<sup>2</sup>.

### Gene Array Analysis

RNA amplification, labeling and hybridization were conducted using Affymetrix GeneChip Hyb, Wash, and Stain kit as previously described<sup>2</sup>. For systematic bioinformatics analysis, IPA was used to assess functional correlations within the different groups. IPA can analyze the gene expression patterns using a build-in scientific literature based database. Stemchecker is a stemness analysis tool that was used to assess for the presence of stemness signatures<sup>3</sup>.

### **SUPPLEMENTAL REFERENCE**

1. Fedchenko N, Reifenrath J. Different approaches for interpretation and reporting of immunohistochemistry analysis results in the bone tissue - a review. *Diagn Pathol* 2014;9:221.
2. McAllister F, Bailey JM, Alsina J, et al. Oncogenic Kras activates a hematopoietic-to-epithelial IL-17 signaling axis in preinvasive pancreatic neoplasia. *Cancer Cell* 2014;25:621-37.
3. Pinto JP, Kalathur RK, Oliveira DV, et al. StemChecker: a web-based tool to discover and explore stemness signatures in gene sets. *Nucleic Acids Res* 2015;43:W72-7.



| Cell movement | Cell development | Cellular growth and proliferation | Cell to cell signaling | Assembly and organization |
|---------------|------------------|-----------------------------------|------------------------|---------------------------|
| ADAMTS1       | ADAM28           | ABCC3                             | AGT                    | AGT                       |
| AGT           | ADAMTS1          | ADAM28                            | ALOX5                  | AVIL                      |
| ALOX5         | AGT              | ADAMTS1                           | ATP1B1                 | BAG3                      |
| AQP1          | Akr1b7           | AGT                               | BCAM                   | CAV2                      |
| BAG3          | ALOX5            | ALOX5                             | CCK                    | CCK                       |
| BMX           | AQP1             | AQP1                              | CDH1                   | CDC42BPA                  |
| C1GALT1       | BMX              | BMX                               | CDHR5                  | CDH1                      |
| CA9           | BTG3             | BTG3                              | CEACAM1                | CGN                       |
| CADPS2        | C1GALT1          | C1GALT1                           | CHGA                   | CHGA                      |
| CCK           | CA9              | CA9                               | CLDN2                  | CLDN2                     |
| CDH1          | CADPS2           | CAV2                              | CLDN4                  | CLDN4                     |
| CEACAM1       | CDH1             | CCK                               | CLU                    | CLMN                      |
| CFTR          | CDHR5            | CDC42BPA                          | CTNND1                 | CLU                       |
| CHGA          | CEACAM1          | CDH1                              | CXADR                  | CTNND1                    |
| CLDN4         | CGN              | CDHR5                             | CXCL6                  | CTTN                      |
| CLU           | CHGA             | CEACAM1                           | CYR61                  | CXADR                     |
| CTBP2         | CHKA             | CFTR                              | DCLK1                  | CYR61                     |
| CTNND1        | CLDN4            | CGN                               | DSP                    | DCLK1                     |
| CTSE          | CLDN18           | CHGA                              | EFNA1                  | DLG5                      |
| CTTN          | CLU              | CHKA                              | EFNB2                  | DSP                       |
| CXCL6         | CTBP2            | CLDN4                             | EPCAM                  | DSTN                      |
| CYP2J2        | CTNND1           | CLMN                              | ERBB2                  | EFNA1                     |
| CYR61         | CTSE             | CLU                               | ERBB3                  | EFNB2                     |
| DCLK1         | CYP2C9           | CTNND1                            | F3                     | EHD2                      |
| DSTN          | CYR61            | CXADR                             | F5                     | EPS8L2                    |
| EFEMP1        | DCLK1            | CYP2C9                            | F2RL1                  | ERBB2                     |
| EFNA1         | DDX6             | CYR61                             | FERMT1                 | F3                        |
| EFNB2         | DLG5             | DCLK1                             | FLNB                   | F2RL1                     |
| EPCAM         | EFNA1            | EFEMP1                            | FLRT3                  | FLNB                      |
| ERBB2         | EFNB2            | EFNA1                             | GSK3B                  | FLRT3                     |
| ERBB3         | ELF3             | EFNB2                             | HBEGF                  | GSK3B                     |
| F3            | ENC1             | ENC1                              | HNF4A                  | HNF1B                     |
| F11R          | EPCAM            | EPCAM                             | HSPA1A/HSPA1B          | HNF4A                     |
| F2RL1         | ERBB2            | ERBB2                             | ITGA2                  | HSPA1A/HSPA1B             |
| FLNB          | ERBB3            | ERBB3                             | ITGB6                  | KLF5                      |
| GRB7          | F3               | F3                                | KRT8                   | KRT8                      |
| GSK3B         | F11R             | F2RL1                             | LAMA5                  | KRT18                     |
| HBEGF         | F2RL1            | FERMT1                            | LBP                    | KRT20                     |
| HSPA1A/HSPA1B | FERMT1           | FLNB                              | LCN2                   | LAMA5                     |
| HYAL1         | FLNB             | GALNT3                            | LEPR                   | LCN2                      |
| ID1           | GALNT3           | GKN1                              | let-7                  | LIMA1                     |
| ITGA2         | GATA5            | Gkn3                              | LIMA1                  | LTF                       |
| KCNE3         | GOLM1            | GOLM1                             | LTF                    | MAL                       |
| KLF5          | GPRC5B           | GRB7                              | Mcpt1                  | MET                       |
| KRT8          | GSK3B            | GSK3B                             | MET                    | MMP7                      |
| LAMA5         | HBEGF            | HBEGF                             | MST1R                  | MST1R                     |
| LAMC2         | HNF1B            | HNF1B                             | MYO6                   | MTM1                      |
| LBP           | HNF4A            | HNF4A                             | NDFIP2                 | MYO6                      |
| LCN2          | HPGD             | HPGD                              | NEU1                   | MYO10                     |
| let-7         | HSPA1A/HSPA1B    | HSPA1A/HSPA1B                     | PCDH1                  | MYO1A                     |
| LGR4          | ID1              | ID1                               | PENK                   | NDFIP2                    |
| LIMA1         | IGFBP7           | IGFBP7                            | PKP2                   | ONECUT2                   |
| LTF           | ITGA2            | ITGA2                             | PLA2G4A                | PENK                      |
| Mcpt1         | KDM2A            | ITGB6                             | PML                    | PLD1                      |

|          |         |          |          |          |
|----------|---------|----------|----------|----------|
| MET      | KLF5    | KDM2A    | PRKCZ    | PLS1     |
| MMP7     | KRT8    | KLF5     | Ptprd    | PRKCZ    |
| MST1R    | KRT18   | KRT8     | PYY      | Ptprd    |
| MUC20    | KRT19   | KRT18    | RAPGEF6  | RAB5B    |
| NT5E     | LAMA5   | KRT19    | RHOB     | RHOB     |
| ONECUT2  | LCN2    | KRT23    | SCARA3   | SEMA5A   |
| OSMR     | LEPR    | LAMA5    | SDC1     | SERPINB5 |
| PENK     | let-7   | LCN2     | SERPINB5 | SHH      |
| PLA2G16  | LGR4    | LEPR     | SFTPD    | SLC12A2  |
| PLA2G4A  | LTF     | let-7    | SHH      | SPP1     |
| PLD1     | MET     | LGR4     | SLC12A2  | TJP1     |
| PML      | MLPH    | LIMA1    | SLC44A4  | VTCN1    |
| PRAP1    | MST1R   | LTF      | SPP1     |          |
| PRDX1    | Muc4    | MET      | TJP1     |          |
| PRKCZ    | MYO6    | MMP7     | VNN1     |          |
| PYY      | OGN     | MST1R    | VTCN1    |          |
| RBP1     | ONECUT2 | MUC13    |          |          |
| RHOB     | PENK    | MYO10    |          |          |
| SDC1     | PLA2G4A | NT5E     |          |          |
| SEMA5A   | PLD1    | ONECUT2  |          |          |
| SERPINB5 | PML     | PENK     |          |          |
| SFTPD    | POU2F3  | PIGR     |          |          |
| SHH      | Ppp1cc  | PLA2G16  |          |          |
| SLC12A2  | PRAP1   | PLA2G4A  |          |          |
| SPP1     | PRKCZ   | PLD1     |          |          |
| TFF1     | Ptprd   | PML      |          |          |
| TIMP3    | RBP1    | PRDX1    |          |          |
| TJP1     | RHOB    | PRKCZ    |          |          |
| TM4SF4   | SDC1    | RBP1     |          |          |
| TM4SF5   | SEMA5A  | RHOB     |          |          |
| TMEM102  | SFN     | S100A14  |          |          |
| TMPRSS4  | SHH     | SDC1     |          |          |
| TNS4     | SIN3A   | SEMA5A   |          |          |
| TSPAN8   | SLC12A2 | SERPINB5 |          |          |
| VIL1     | SMPD3   | SFN      |          |          |
| VTCN1    | SPP1    | SFTPD    |          |          |
|          | TFF1    | SGPP2    |          |          |
|          | TIMP3   | SHH      |          |          |
|          | TJP1    | SIN3A    |          |          |
|          | TMEM54  | SLC12A2  |          |          |
|          | VSIG1   | SPP1     |          |          |
|          | VTCN1   | SPRR1A   |          |          |
|          |         | TFF1     |          |          |
|          |         | TIMP3    |          |          |
|          |         | TJP1     |          |          |
|          |         | TM4SF4   |          |          |
|          |         | VSIG1    |          |          |
|          |         | VTCN1    |          |          |

**Supplementary Table 2.**

RNA Seq on KPC Cells exposed to IL-17 vs media for 24 hrs

| gene ID   | gene symbol   | IL17vsControl. Fold change | IL17vsControl pVal |
|-----------|---------------|----------------------------|--------------------|
| 16819     | Lcn2          | 8.21993                    | 0.000936025        |
| 17002     | Ltf           | 6.93085                    | 0.000338283        |
| 20762     | Sprr2h        | 6.23378                    | 0.000338283        |
| 76509     | 1600029D21Rik | 5.68675                    | 0.000338283        |
| 229927    | Clca4         | 5.61399                    | 0.000338283        |
| 100303738 | D030025P21Rik | 5.27872                    | 0.000338283        |
| 26464     | Vnn3          | 4.90676                    | 0.000338283        |
| 16165     | Il13ra2       | 4.82743                    | 0.000338283        |
| 20311     | Cxcl5         | 4.57577                    | 0.000338283        |
| 18173     | Slc11a1       | 4.46182                    | 0.025101           |
| 17063     | Muc13         | 4.44134                    | 0.000936025        |
| 13661     | Ehf           | 4.20139                    | 0.000338283        |
| 330122    | Cxcl3         | 4.14562                    | 0.000338283        |
| 12985     | Csf3          | 4.14315                    | 0.000338283        |
| 16997     | Ltbp2         | 4.07701                    | 0.000338283        |
| 18987     | Pou2f2        | 4.066                      | 0.000338283        |
| 213696    | Duoxa1        | 3.82423                    | 0.000338283        |
| 80797     | Clca2         | 3.79902                    | 0.000338283        |
| 19415     | Rasal1        | 3.7223                     | 0.000338283        |
| 12291     | Cacna1g       | 3.65439                    | 0.000338283        |
| 104886    | Rab15         | 3.5739                     | 0.00199449         |
| 80885     | Niacr1        | 3.51825                    | 0.000338283        |
| 241275    | Noxa1         | 3.43897                    | 0.000338283        |
| 20731     | Spink4        | 3.31326                    | 0.030448           |
| 21926     | Tnf           | 3.28706                    | 0.000338283        |
| 230738    | Zc3h12a       | 3.28589                    | 0.000338283        |
| 12409     | Cbr2          | 3.28453                    | 0.003225           |
| 12609     | Cebpd         | 3.19615                    | 0.000338283        |
| 16193     | Il6           | 3.08352                    | 0.003225           |
| 20297     | Ccl20         | 2.94563                    | 0.000338283        |
| 17951     | Naip5         | 2.87324                    | 0.000338283        |
| 625286    | Tmem236       | 2.86634                    | 0.000338283        |
| 109335    | 9230102K24Rik | 2.81648                    | 0.00589477         |
| 14825     | Cxcl1         | 2.80012                    | 0.000338283        |
| 100502940 | Gm684         | 2.78943                    | 0.000338283        |
| 69583     | Tnfsf13       | 2.77991                    | 0.000338283        |
| 18383     | Tnfrsf11b     | 2.77891                    | 0.000338283        |
| 320563    | Islr2         | 2.77372                    | 0.000338283        |
| 16803     | Lbp           | 2.76536                    | 0.000338283        |
| 20322     | Sord          | 2.63406                    | 0.000338283        |
| 108995    | Tbc1d10c      | 2.61843                    | 0.000338283        |
| 11997     | Akr1b7        | 2.61624                    | 0.000338283        |
| 20765     | Sprr2k        | 2.57946                    | 0.000338283        |
| 12023     | Barx2         | 2.54781                    | 0.000338283        |
| 414084    | Tnip3         | 2.545                      | 0.000338283        |
| 54199     | Ccl2          | 2.53981                    | 0.000338283        |
| 76974     | Urah          | 2.51103                    | 0.000338283        |
| 12837     | Col8a1        | 2.48435                    | 0.000338283        |
| 16175     | Il1a          | 2.47925                    | 0.000338283        |
| 108116    | Slco3a1       | 2.447                      | 0.000338283        |
| 80859     | Nfkbiz        | 2.41498                    | 0.000338283        |
| 20310     | Cxcl2         | 2.39108                    | 0.000338283        |
| 26365     | Ceacam1       | 2.38132                    | 0.000338283        |
| 57349     | Ppbp          | 2.34183                    | 0.000338283        |
| 18578     | Pde4b         | 2.22972                    | 0.000338283        |
| 239759    | Liph          | 2.18374                    | 0.000338283        |
| 71287     | Cpvl          | 2.1282                     | 0.00504837         |
| 18300     | Oit1          | 2.1247                     | 0.000338283        |

|           |               |         |             |
|-----------|---------------|---------|-------------|
| 17952     | Naip6         | 2.10649 | 0.000338283 |
| 18811     | Prl2c2        | 2.08246 | 0.000338283 |
| 23844     | Clca3         | 2.06328 | 0.000338283 |
| 100039239 | Gm2115        | 2.05854 | 0.000338283 |
| 24099     | Tnfsf13b      | 2.05445 | 0.000338283 |
| 216643    | Gabrp         | 2.05357 | 0.000338283 |
| 67280     | 3110009F21Rik | 2.05174 | 0.000338283 |
| 74424     | Tmc5          | 2.04371 | 0.000338283 |
| 19085     | Prkar1b       | 1.97934 | 0.000338283 |
| 70717     | Medag         | 1.97453 | 0.000338283 |
| 12266     | C3            | 1.9555  | 0.000338283 |
| 545902    | Ptprh         | 1.92452 | 0.000338283 |
| 99662     | Eps8l3        | 1.92223 | 0.000338283 |
| 20761     | Sprr2g        | 1.8777  | 0.0252597   |
| 12981     | Csf2          | 1.87653 | 0.000338283 |
| 11539     | Adora1        | 1.84291 | 0.000338283 |
| 242122    | Vtcn1         | 1.84286 | 0.000338283 |
| 19142     | Prss12        | 1.8376  | 0.000338283 |
| 19200     | Pstpip1       | 1.83313 | 0.000338283 |
| 244595    | Ces1a         | 1.81091 | 0.000338283 |
| 209558    | Enpp3         | 1.81064 | 0.000338283 |
| 57319     | Smpdl3a       | 1.79786 | 0.000338283 |
| 71893     | Noxo1         | 1.79405 | 0.000338283 |
| 106042    | Prickle1      | 1.78357 | 0.000338283 |
| 20500     | Slc13a2       | 1.77909 | 0.000338283 |
| 22436     | Xdh           | 1.77858 | 0.000338283 |
| 18414     | Osmr          | 1.77554 | 0.000338283 |
| 242125    | Mab2113       | 1.75295 | 0.000338283 |
| 23947     | Mid2          | 1.74296 | 0.000338283 |
| 13615     | Edn2          | 1.71523 | 0.000338283 |
| 100040462 | Mndal         | 1.6999  | 0.000338283 |
| 20306     | Ccl7          | 1.69342 | 0.0210892   |
| 70417     | Megf10        | 1.68405 | 0.000338283 |
| 433470    | AA467197      | 1.6838  | 0.000338283 |
| 21946     | Pglyrp1       | 1.67707 | 0.000338283 |
| 107607    | Nod1          | 1.66277 | 0.000338283 |
| 12494     | Cd38          | 1.64779 | 0.000338283 |
| 12819     | Col15a1       | 1.60217 | 0.000338283 |
| 28105     | Trim36        | 1.60075 | 0.000338283 |
| 11647     | Alpl          | 1.58373 | 0.000338283 |
| 233552    | Gdpd5         | 1.58339 | 0.000338283 |
| 207686    | A330021E22Rik | 1.55277 | 0.000338283 |
| 11717     | Ampd3         | 1.55058 | 0.000338283 |
| 69083     | Sult1c2       | 1.53521 | 0.000338283 |
| 18585     | Pde9a         | 1.52701 | 0.000338283 |
| 57425     | U90926        | 1.52204 | 0.0378341   |
| 17857     | Mx1           | 1.50934 | 0.000338283 |



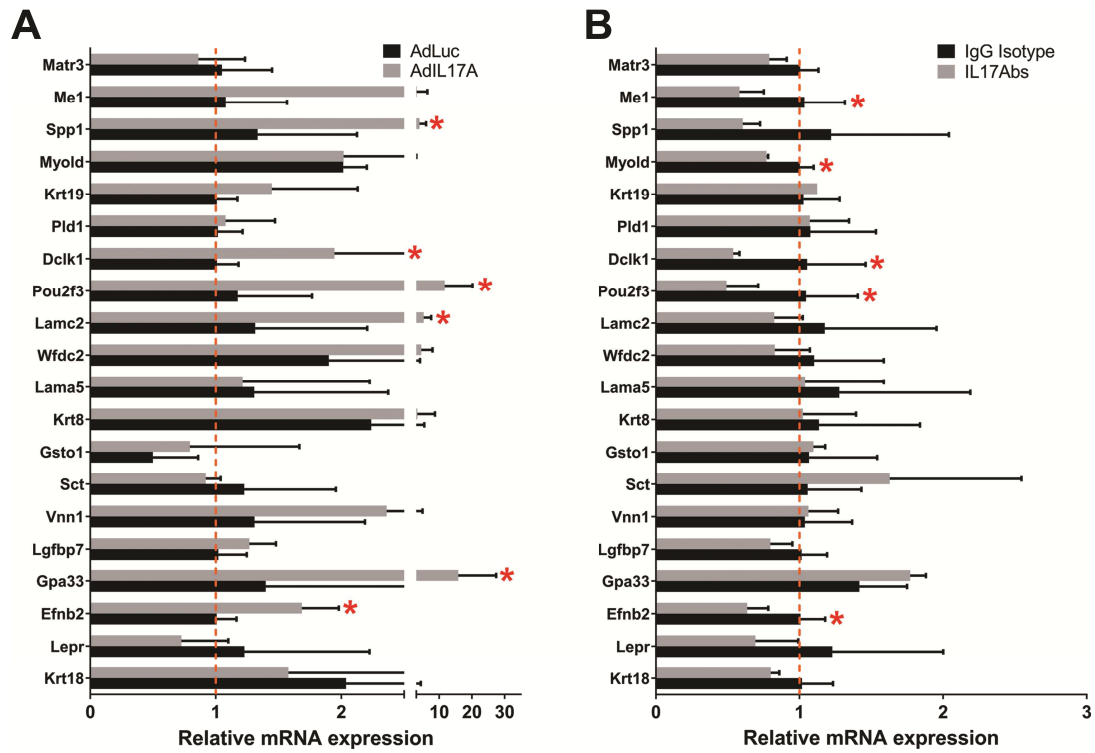

**Figure S2.** Relative mRNA expression of the top-20 individual ESC signature genes quantified by RT-PCR from pancreas RNA extraction from  $KC^{Mist1}$  Ad Luc and  $KC^{Mist1}$  AdIL-17 mice (A) and  $KC^{Mist1}$  mice received IL-17 neutralizing antibodies and isotype (B).

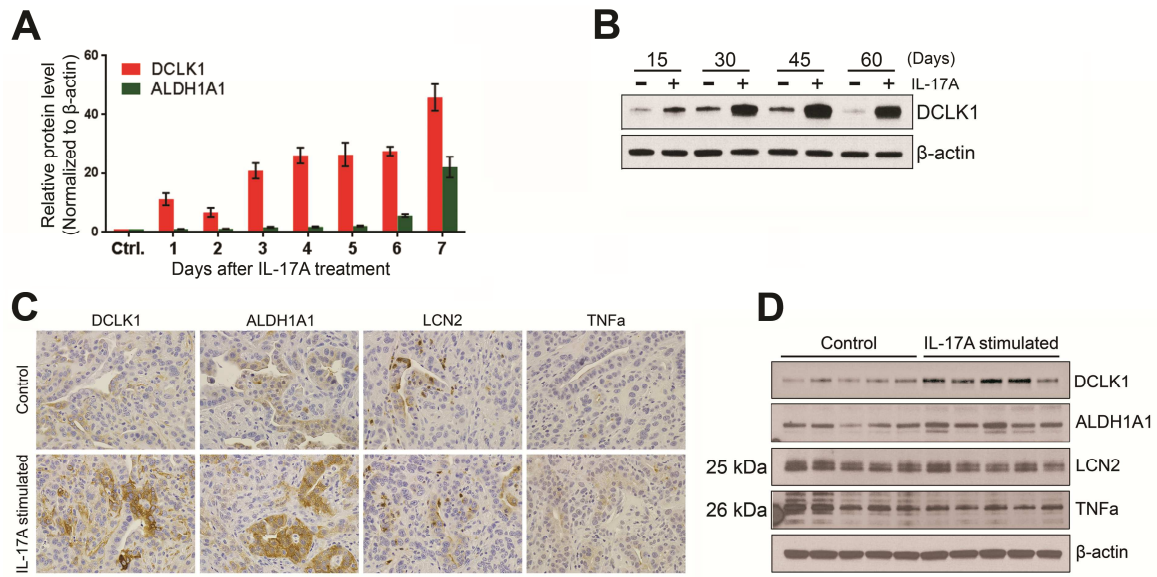

**Figure S3.** (A) Quantification of Dcl1 and Aldh1a1 Immunoblotting results expressed as relative protein level normalized to  $\beta$ -actin. Error bars indicate the SEM from two individual assays. (B) Immunoblotting for Dcl1 on KPC cells stimulated with IL-17A vs media alone for up to 60 days. (C) Representative figure of Dcl1, Aldh1a1, LCN2 and TNF $\alpha$  on subcutaneous tumors developed from IL-17A- stimulated vs control (exposed to media alone) KPC cells. (D) Immunoblotting for Dcl1, Aldh1a1, LCN2, and TNF $\alpha$  on tumors formed with subcutaneously injected KPC cells pre-incubated with IL-17A vs control. Tumors were removed 10 days after KPC cells injections.

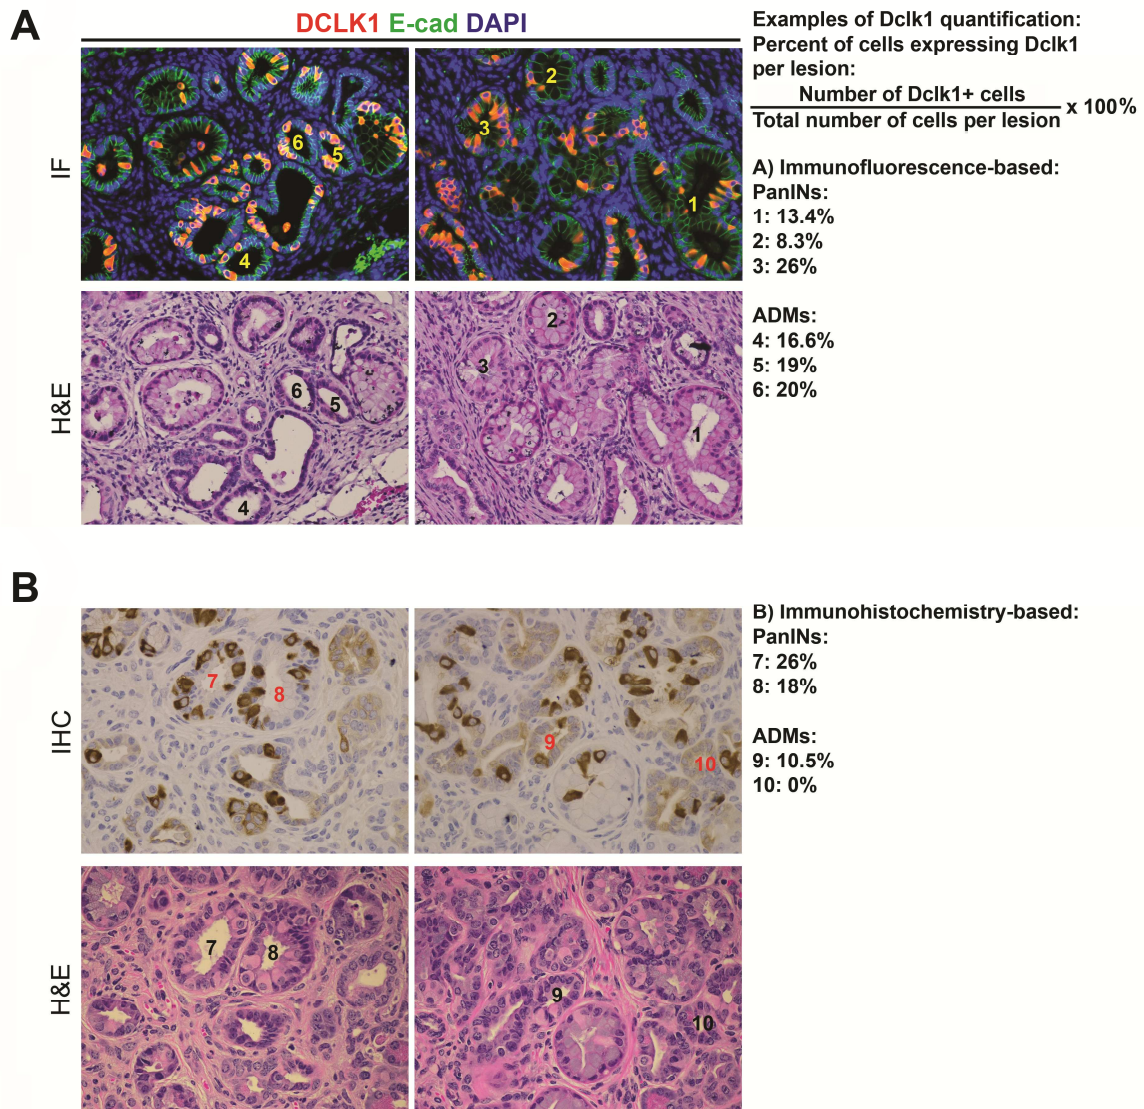

**Figure S4.** (A,B) Detail of immunofluorescent (A) or immunohistochemical (B) detection and quantification of Dclk1-expressing cells in images from  $KC^{Mist1}$  mice. Parallel sections stained with H&E were matched with each slide. For each image, 2-3 examples of Dclk1 quantification were given. The total number of cells per lesion (ADM or PanIN) and the number of Dclk1 expressing cells per lesion were quantified. Results were expressed as percent of Dclk1+ cells/lesion.



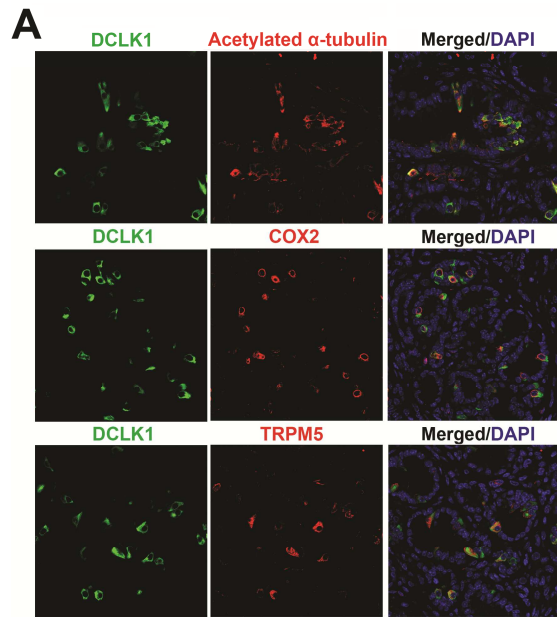

**B**

| Percent of positive cells/Total Dclk1+ cells in PanINs |             |
|--------------------------------------------------------|-------------|
| Ac- $\alpha$ -Tubulin+                                 | 98          |
| COX2+                                                  | 93.75       |
| TRPM5+                                                 | 91.66666667 |

**Figure S5.** (A) Representative pictures of immunofluorescence co-staining of Dclk1 with Acetylated  $\alpha$ -tubulin, COX2 and TRPM5 individually in ADMs or PanINs from  $KC^{Mist1}$  mice. (B) Table shows the quantification of percent of Dclk1+ cells expressing each of the tuft cell markers.

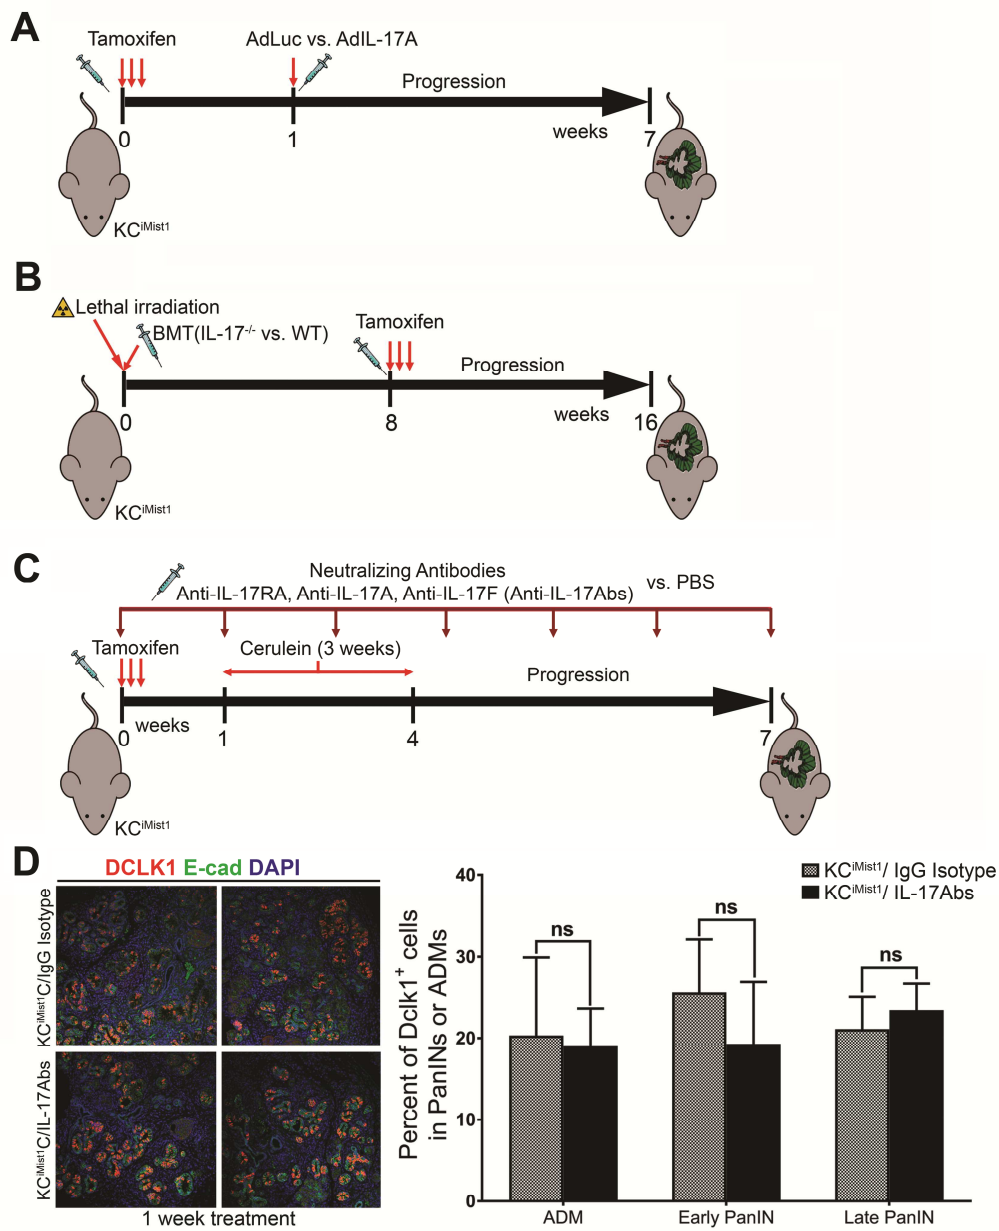

**Figure S6.** (A) Protocol for Kras activation and delivery of adenovirus encoding for IL-17A vs Luciferase (Luc) to KC<sup>Mist1</sup> mouse pancreas. (B) Protocol for the generation of KC<sup>Mist1</sup>/IL-17AWT and KC<sup>Mist1</sup>/IL-17AKO bone marrow (BM) chimeric animals. (C) Protocol for the treatment of KC<sup>Mist1</sup> mice with IL-17 neutralizing antibodies vs IgG isotype 7 weeks after cerulean inoculations. (D) Representative pictures of Dclk1 and e-cadherin immunofluorescence staining in ADMs or PanINs from KC<sup>Mist1</sup> mice challenged with cerulean and treated for 1 week with IL-17 neutralizing antibodies vs IgG isotype (left); Quantification of the percent of cells expressing Dclk-1 per ADMs or PanIN (right).

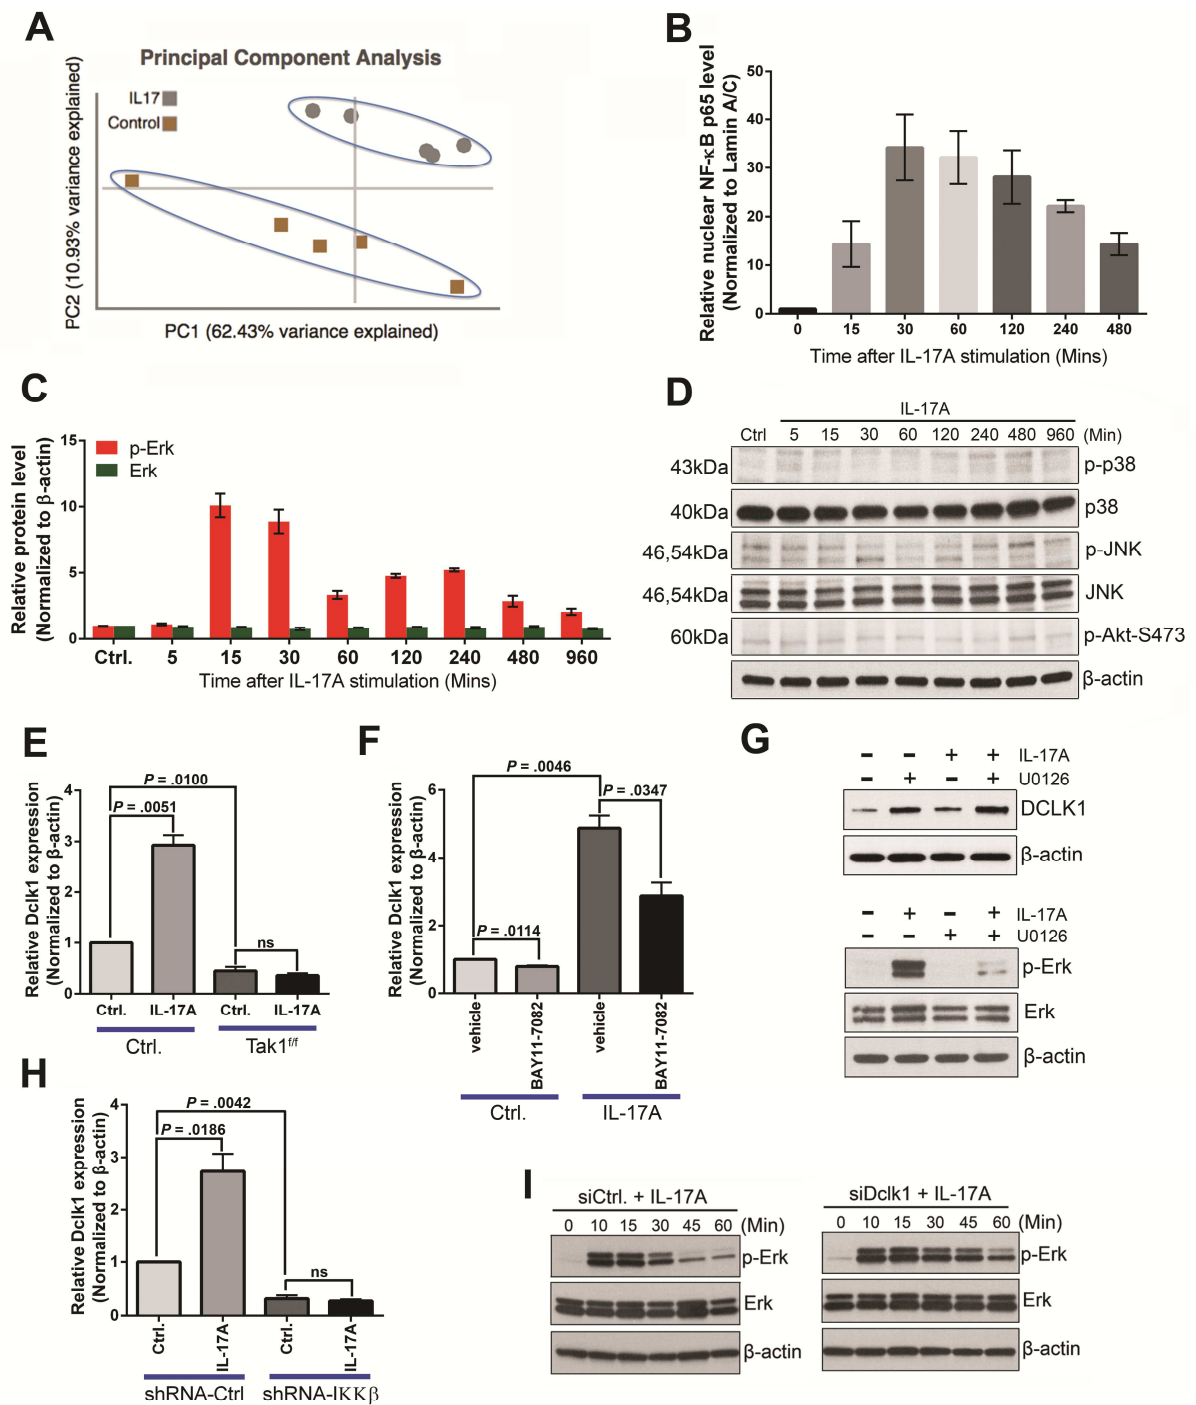

**Figure S7.** (A) Principal component analysis (PCA) showed the samples from KPC stimulated with IL-17A or control cluster together. (B) Quantification of nuclear NF- $\kappa$ B p65 immunoblotting results expressed as relative protein level normalized to Lamin A/C. Error bars indicate the SEM from two individual assays. (C) Quantification of p-Erk and total Erk immunoblotting results expressed as relative protein level normalized to  $\beta$ -actin. Error bars indicate the SEM from two individual assays. (D) Immunoblotting for p-p38, p38, p-JNK, JNK and P-Akt of KPC cells stimulated with IL-17A. (E, F, H) Quantification of Dclk1 immunoblotting results upon IL-17A stimulation using Tak<sup>fl/fl</sup> KPC cells (E), BAY11-7082 (F) and shRNA-IKK $\beta$  (H). Results are expressed as relative protein level normalized to  $\beta$ -actin. Error bars indicate the SEM from two individual assays. (G) Immunoblotting for Dclk1 (upper), p-Erk and total Erk (lower) on KPC cells stimulated with IL-17A upon MAPK pathway inhibitor (U0126) for 5 days. (I) Immunoblotting for p-Erk and total Erk on KPC cells transfected with siRNA: siDCLK1(right) or siCtrl. (left) stimulated with IL-17A.

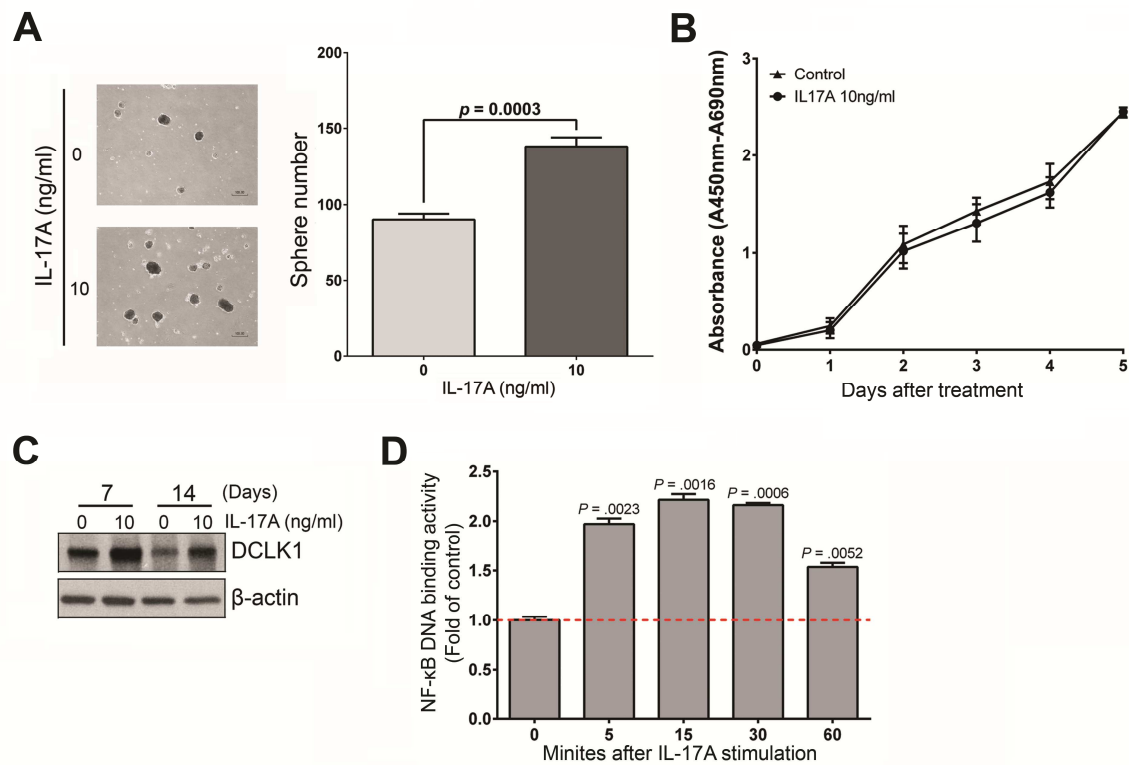

**Figure S8.** (A) Representative pictures (left) and quantification of tumorspheres (right) developed from Capan-2 cells *in vitro* stimulated with IL-17A (10 ng/ml). The tumorsphere assay has been repeated 3 times. Results of one representative experiment are shown. (B) Representative quantification of IL-17A-stimulated Capan-2 cells proliferation as measured by WST-1 cell proliferation test. (C) Immunoblotting for Dclk1 on Capan-2 cells stimulated with IL-17A (+) vs media alone for 7 and 14 days. (D) Time-dependent NF- $\kappa$ B DNA binding activity measured in Capan-2 cells stimulated with IL-17A. Results are expressed as fold changes over control Capan-2 cells untreated. This experiment was repeated 2 times and a representative experiment is shown.

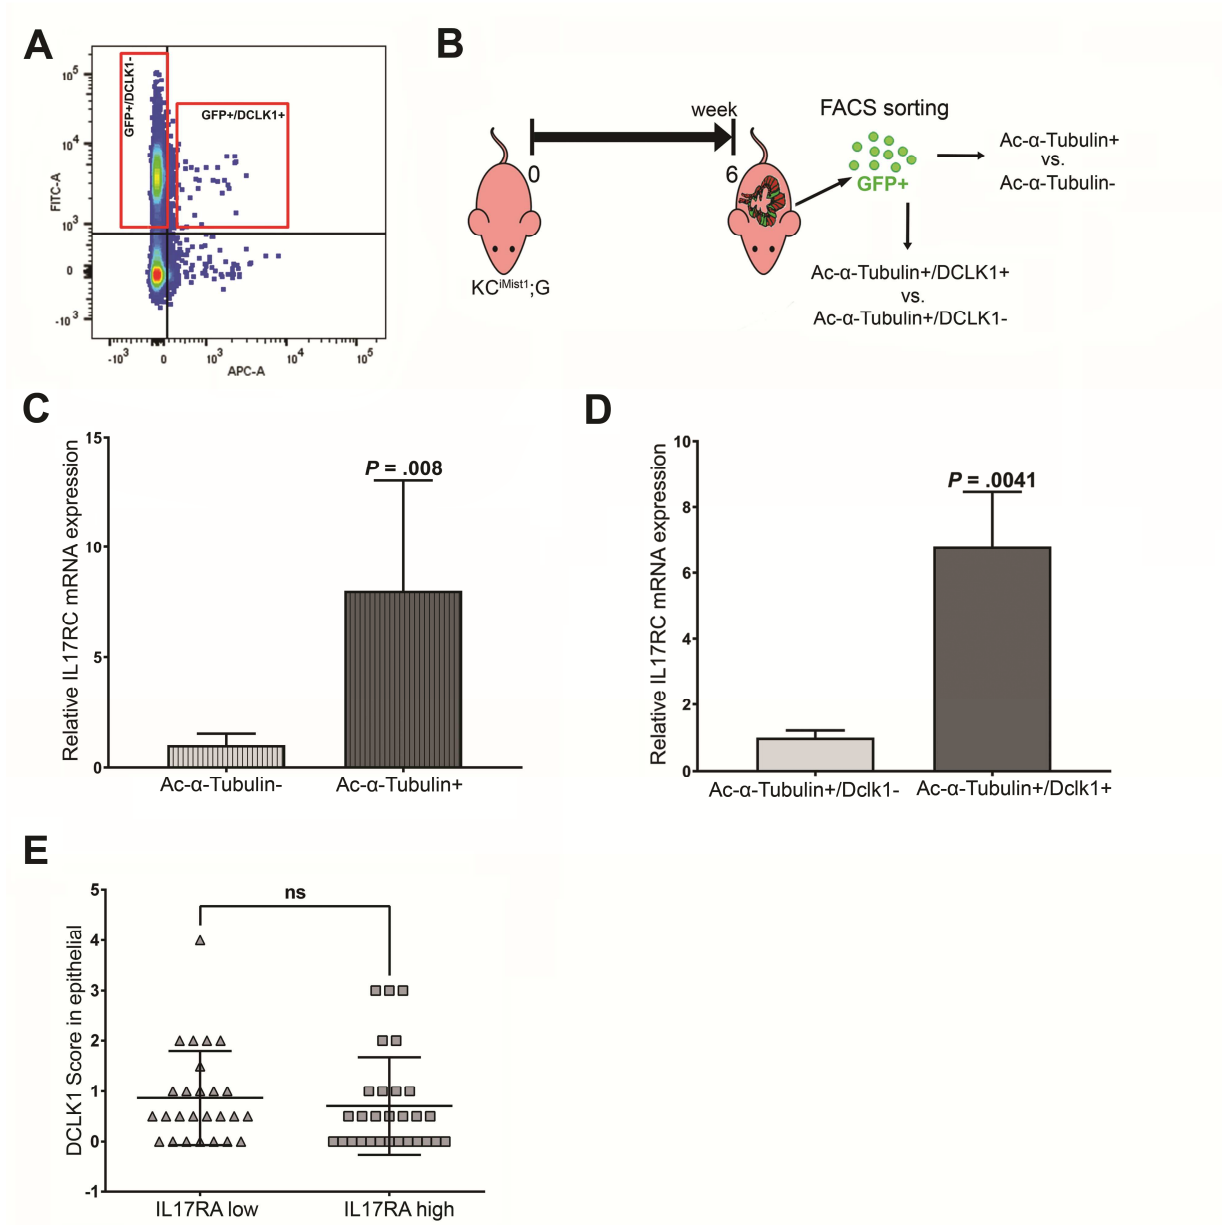

**Figure S9.** (A) Sorted fractions of GFP+/Dclk1+ and GFP+/Dclk1- cells from KC<sup>iMist1</sup>;G mice (expressed as percent of total GFP+ cells). (B) Protocol for sorting GFP+/Ac-α-Tubulin- vs GFP+/Ac-α-Tubulin+ cells or GFP+/Ac-α-Tubulin+/Dclk1- vs GFP+/Ac-α-Tubulin+/Dclk1+ cells from KPCiMist1;G mouse. (C, D) Taqman PCR for quantification of mRNA expression of IL-17RC in Ac-α-Tubulin-, Ac-α-Tubulin+ (C) and Ac-α-Tubulin+/Dclk1-, Ac-α-Tubulin+/Dclk1+ (D) expressing GFP+ KPC cells. (E) Comparison of DCLK1 expression between human PDAC with IL17RA high expression and IL17RA low expression, based on immunohistochemistry staining score.
